# Supplementary material
Source: publisher site journal article supplement (https://www.degruyterbrill.com/publication/isbn/9783110452228/downloadAsset/9783110452228_Gramsch_Kap9.pdf)
Supplement: Supplementary file 1 [file 9783110452228_Gramsch_Kap9.pdf]

Gramsch-Stehfest, S. 136:

Das „Kaiserbad, welches Sonne und Mond genannt wird“ in Pozzuoli, eingebaut in eine antike Ruine. Darstellung in einer illustrierten Handschrift des Petrus de Ebulo *De balneis Puteolanis* (italienisch, 14. Jahrhundert, BNF Latin 8161, fol. 19r)

**Link:** <https://gallica.bnf.fr/ark:/12148/btv1b8454698g/f39.image> (Online-Edition der Bibliothèque nationale de France, siehe auch: <https://archivesetmanuscrits.bnf.fr/ark:/12148/cc67428r>)

Gramsch-Stehfest, S. 140:

**Aderlassmännlein.** An den markierten Stellen soll, je nach behandelter Krankheit, der Aderlass vorgenommen werden.  
Illustration in einer englischen Handschrift (15. Jahrhundert)

**Link:** <https://www.akg-images.de/archive/-2UMDHUKJ14FN.html>

Gramsch-Stehfest, S. 141:

**Darstellung eines arabischen Arztes (Hakim) und eines Astrologen** am Krankenbett König Wilhelms II. von Sizilien, Illustration im *Liber ad honorem Augusti* des Petrus de Ebulo, fol. 97r (ed. Kölzer / Stähli 1994, S. 43)

**Link:** <https://www.e-codices.unifr.ch/de/bbb/0120-2//97r> (Online-Edition der Berner Burger-Bibliothek, siehe auch: <https://www.e-codices.unifr.ch/de/description/bbb/0120-2/Mittenhuber>)

Gramsch-Stehfest, S. 143:

Grabplatte des **Mainzer Erzbischofs Peter (von Aspelt)** im Mainzer Dom (um 1320), dargestellt als *Coronator* dreier Könige

**Link:** <https://www.akg-images.de/archive/-2UMDHUR4UI.html>
